# Supplementary material for: Hippocampal Lesions Impair Rapid Learning of a Continuous Spatial Alternation Task
Source: PLOS journal article supplement (doi:10.1371/journal.pone.0005494), 2009-05-07
Supplement: S1 (10.1371/journal.pone.0005494.s001) [file journal.pone.0005494.s001]

**Table S1.** Measures of behavioral performance for each animal.

|          |                                                                                 | Control subjects |      |      |      | Hippocampal lesion subjects |       |      |       |      |       | <i>p</i> -value of between-groups comparison (Wilcoxon rank sum test) |
|----------|---------------------------------------------------------------------------------|------------------|------|------|------|-----------------------------|-------|------|-------|------|-------|-----------------------------------------------------------------------|
|          |                                                                                 | C1               | C2   | C3   | C4   | L1                          | L2    | L3   | L4    | L5   | L6    |                                                                       |
| Inbound  | Total number of inbound trials performed, days 1-10                             | 576              | 493  | 489  | 650  | 481                         | 810   | 996  | 736   | 1064 | 1036  | 0.11                                                                  |
|          | Number of inbound trials to reach learning criterion on inbound task component  | 266              | 150  | 43   | 77   | 297                         | 778   | 124  | >736* | 819  | 668   | 0.038                                                                 |
|          | Days to reach learning criterion on inbound task component                      | 6                | 4    | 2    | 2    | 8                           | 10    | 2    | >10*  | 8    | 7     | 0.057                                                                 |
|          | Mean estimated probability of correct inbound performance on day 10             | 0.96             | 0.98 | 0.94 | 0.97 | 0.95                        | 0.77  | 0.92 | 0.70  | 0.89 | 1.00  | 0.26                                                                  |
| Outbound | Total number of outbound trials performed, days 1-10                            | 519              | 259  | 535  | 587  | 269                         | 602   | 856  | 594   | 762  | 847   | 0.11                                                                  |
|          | Number of outbound trials to reach learning criterion on inbound task component | 55               | 214  | 37   | 58   | >269*                       | >602* | 381  | 483   | 410  | >847* | 0.0095                                                                |
|          | Days to reach learning criterion on outbound task component                     | 3                | 5    | 2    | 2    | >10*                        | >10*  | 6    | 9     | 7    | >10*  | 0.0095                                                                |
|          | Mean estimated probability of correct outbound performance on day 10            | 0.85             | 0.93 | 0.84 | 0.87 | 0.14                        | 0.44  | 0.96 | 0.85  | 0.79 | 0.84  | 0.17                                                                  |

\*Asterisks indicate that the subject did not reach the learning criterion within the 10 days of testing.
